# Supplementary material for: A comprehensive model of the phototransduction cascade in mouse rod cells
Source: Royal Society of Chemistry journal article supplement (doi:10.1039/c3mb70584f), 2014-03-20
Supplement: c3mb70584f1.pdf [file c3mb70584f1.pdf]

## Supplementary Information: A comprehensive model of the phototransduction cascade in mouse rod cells

Brandon M. Invergo,<sup>\*a‡</sup> Daniele Dell'Orco,<sup>b</sup> Ludovica Montanucci,<sup>a</sup> Karl-Wilhelm Koch,<sup>c</sup> and Jaume Bertranpetit<sup>a</sup>

### Supplementary Tables

- Table S1: Reactions and kinetics of the phototransduction model
- Table S2: Signal amplification-related parameter values and sources
- Table S3: Signal recovery-related model parameter values and sources

---

<sup>a</sup> IBE - Institute of Evolutionary Biology (CSIC-Universitat Pompeu Fabra), CEXS-UPF-PRBB, Barcelona, Catalonia, Spain.

<sup>b</sup> Department of Life Sciences and Reproduction, Section of Biological Chemistry and Center for BioMedical Computing (CBMC), University of Verona, Verona, Italy.

<sup>c</sup> Department of Neuroscience, Biochemistry Group, Carl von Ossietzky University Oldenburg, Oldenburg, Germany.

‡ Present address: European Molecular Biology Laboratory, European Bioinformatics Institute (EMBL-EBI), Wellcome Trust Genome Campus, Hinxton, Cambridge CB10 1SD, UK. Tel: (+44) (0)1223 49 2547; Email: invergo@ebi.ac.uk;

**Table S1** Reactions and kinetics of the phototransduction model

| Reaction Equation                                                                             | Reaction kinetics                                                              | Comments                                                                                                                                                                                                       |
|-----------------------------------------------------------------------------------------------|--------------------------------------------------------------------------------|----------------------------------------------------------------------------------------------------------------------------------------------------------------------------------------------------------------|
| $R \xrightarrow{\text{stimulus}} R_0$                                                         | $v_f = \text{stimulus} \frac{R}{R_{tot}}$                                      | Photoactivation of unphosphorylated R                                                                                                                                                                          |
| $R \cdot G_t \xrightarrow{\text{stimulus}} R_0 \cdot G_t$                                     | $v_f = \text{stimulus} \frac{R \cdot G_t}{R_{tot}}$                            | Photoactivation of pre-coupled $R \cdot G_t$                                                                                                                                                                   |
| $R_n + RK \xrightleftharpoons[kRK2]{kRK1_n} R_n \cdot RK_{pre} \quad  _{n=0,1,\dots,6}$       | $v_f = kRK1_n \times R_n \times RK$<br>$v_r = kRK2 \times R_n \times RK_{pre}$ | Binding of $R_n$ and RK. The association rate constant is assumed to decrease exponentially with increasing phosphorylations: $kRK1_n = kRK1_0 e^{-\alpha n}$                                                  |
| $R_n \cdot RK_{pre} \xrightarrow{kRK3_{ATP}} R_{n+1} \cdot RK_{post} \quad  _{n=0,1,\dots,5}$ | $v_f = kRK3_{ATP} \times R_n \cdot RK_{pre}$                                   | Phosphorylation of $R_n$ to give $R_{n+1}$                                                                                                                                                                     |
| $R_n \cdot RK_{post} \xrightarrow{kRK4} R_n + RK \quad  _{n=1,2,\dots,6}$                     | $v_f = kRK4 \times R_n \cdot RK_{post}$                                        | Dissociation of the $R_n \cdot RK$ complex                                                                                                                                                                     |
| $R_n + Arr \xrightleftharpoons[kA2]{kA1_n} R_n \cdot Arr \quad  _{n=1,2,\dots,6}$             | $v_f = kA1_n \times R_n \times Arr$<br>$v_r = kA2 \times R_n \cdot Arr$        | Binding of $R_n$ and Arr. The association rate constant increases linearly with the first four phosphorylations: $kA1_n = \begin{cases} kArr + (n-1)m_{Arr} & n \leq 4 \\ kArr + 3m_{Arr} & n > 4 \end{cases}$ |
| $R_n \cdot Arr \xrightarrow{kA3} Ops + Arr \quad  _{n=1,2,\dots,6}$                           | $v_f = kA3 \times R_n \cdot Arr$                                               | Arr-mediated inactivation of $R_n$ . Ops indicates the ligand-free receptor                                                                                                                                    |
| $Arr + Arr \xrightleftharpoons[kA5]{kA4} Arr_{di}$                                            | $v_f = kA4 \times Arr^2$<br>$v_r = kA5 \times Arr_{di}$                        | Arr homo-dimerization                                                                                                                                                                                          |
| $Arr_{di} + Arr_{di} \xrightleftharpoons[kA5]{kA4} Arr_{tetra}$                               | $v_f = kA4 \times Arr_{di}^2$<br>$v_r = kA5 \times Arr_{tetra}$                | Arr homo-tetramerization                                                                                                                                                                                       |
| $R_n \xrightarrow{ktherm} Ops \quad  _{n=0,1,\dots,6}$                                        | $v_f = ktherm \times R_n$                                                      | Thermal decay of catalytic active form of $R_n$ to give Ops                                                                                                                                                    |
| $Ops + G_t \xrightleftharpoons[kG2]{kOps} Ops \cdot G_t$                                      | $v_f = kOps \times Ops \times G_t$<br>$v_r = kG2 \times Ops \cdot G_t$         | Spontaneous Ops activity                                                                                                                                                                                       |
| $Ops \cdot G_t \xrightleftharpoons[kG4_{GDP}]{kG3} Ops \cdot G$                               | $v_f = kG3 \times Ops \cdot G_t$<br>$v_r = kG4_{GDP} \times Ops \cdot G$       | GDP dissociation from the $Ops \cdot G_t$ complex                                                                                                                                                              |

Table S1 – Continued from previous page

| Reaction Equation                                                                                                                                             | Reaction kinetics                                                                                                             | Comments                                                                                                                                                                            |
|---------------------------------------------------------------------------------------------------------------------------------------------------------------|-------------------------------------------------------------------------------------------------------------------------------|-------------------------------------------------------------------------------------------------------------------------------------------------------------------------------------|
| $\text{Ops} \cdot \text{G} \xrightarrow{kG5_{GTP}} \text{Ops} \cdot \text{G}_{GTP}$                                                                           | $v_f = kG5_{GTP} \times \text{Ops} \cdot \text{G}$                                                                            | GTP binding to the Ops · G <sub>t</sub> complex                                                                                                                                     |
| $\text{Ops} \cdot \text{G}_{GTP} \xrightarrow{kG6} \text{Ops} + \text{G}_{GTP}$                                                                               | $v_f = kG6 \times \text{Ops} \cdot \text{G}_{GTP}$                                                                            | Dissociation of the Ops · G <sub>GTP</sub> complex                                                                                                                                  |
| $\text{Ops} \xrightarrow{kR_{recyc}} \text{R}$                                                                                                                | $v_f = kR_{recyc} \times \text{Ops}$                                                                                          | Chromophore regeneration by 11-cis retinal binding to Ops                                                                                                                           |
| $\text{R} + \text{G}_t \xrightleftharpoons[kG_{pre2}]{kG_{pre1}} \text{R} \cdot \text{G}_t$                                                                   | $v_f = kG_{pre1} \times \text{G}_t \times \text{R}$<br>$v_r = kG_{pre2} \times \text{R} \cdot \text{G}_t$                     | Pre-coupling of inactive R to G <sub>t</sub> , where $kG_{pre1} = 1.6 kG1_0$ and $kG_{pre2} = 315 kG2$                                                                              |
| $\text{R}_n + \text{G}_t \xrightleftharpoons[kG2]{kG1_n} \text{R}_n \cdot \text{G}_t \mid_{n=0,1,\dots,6}$                                                    | $v_f = kG1_n \times \text{R} \times \text{G}_t$<br>$v_r = kG2 \times \text{R} \cdot \text{G}_t$                               | Binding of R <sub>n</sub> and G <sub>t</sub> . The association rate constant is assumed to decrease exponentially with increasing phosphorylations: $kG1_n = kG1_0 e^{-\omega_G n}$ |
| $\text{R}_n \cdot \text{G}_t \xrightleftharpoons[kG4_{GDP}]{kG3} \text{R}_n \cdot \text{G} \mid_{n=0,1,\dots,6}$                                              | $v_f = kG3 \times \text{R}_n \cdot \text{G}_t$<br>$v_r = kG4_{GDP} \times \text{R}_n \cdot \text{G}$                          | GDP dissociation from the R <sub>n</sub> · G <sub>t</sub> complex                                                                                                                   |
| $\text{R}_n \cdot \text{G} \xrightarrow{kG5_{GTP}} \text{R}_n \cdot \text{G}_{GTP} \mid_{n=0,1,\dots,6}$                                                      | $v_f = kG5_{GTP} \times \text{R}_n \cdot \text{G}$                                                                            | GTP binding to the R <sub>n</sub> · G <sub>t</sub> complex                                                                                                                          |
| $\text{R}_n \cdot \text{G}_{GTP} \xrightarrow{kG6} \text{R}_n + \text{G}_{GTP} \mid_{n=0,1,\dots,6}$                                                          | $v_f = kG6 \times \text{R}_n \cdot \text{G}_{GTP}$                                                                            | Dissociation of the R <sub>n</sub> · G <sub>GTP</sub> complex                                                                                                                       |
| $\text{G}_{GTP} \xrightarrow{kG7} \text{G}_{\alpha GTP} + \text{G}_{\beta\gamma}$                                                                             | $v_f = kG7 \times \text{G}_{GTP}$                                                                                             | Dissociation of trimeric G <sub>t</sub> into α and βγ subunits                                                                                                                      |
| $\text{PDE} + \text{G}_{\alpha GTP} \xrightleftharpoons[kP1_{rev}]{kP1} \text{PDE} \cdot \text{G}_{\alpha GTP}$                                               | $v_f = kP1 \times \text{PDE} \times \text{G}_{\alpha GTP}$<br>$v_r = kP1_{rev} \times \text{PDE} \cdot \text{G}_{\alpha GTP}$ | Binding of G <sub>αGTP</sub> to one PDE inactive subunit                                                                                                                            |
| $\text{PDE} \cdot \text{G}_{\alpha GTP} \xrightarrow{kP2} \text{PDE}^* \cdot \text{G}_{\alpha GTP}$                                                           | $v_f = kP2 \times \text{PDE} \cdot \text{G}_{\alpha GTP}$                                                                     | Activation of the PDE · G <sub>αGTP</sub> complex                                                                                                                                   |
| $\text{PDE}^* \cdot \text{G}_{\alpha GTP} + \text{G}_{\alpha GTP} \xrightarrow{kP3} \text{G}_{\alpha GTP} \cdot \text{PDE}^* \cdot \text{G}_{\alpha GTP}$     | $v_f = kP3 \times \text{PDE}^* \cdot \text{G}_{\alpha GTP} \times \text{G}_{\alpha GTP}$                                      | Binding of G <sub>αGTP</sub> to singly active PDE                                                                                                                                   |
| $\text{G}_{\alpha GTP} \cdot \text{PDE}^* \cdot \text{G}_{\alpha GTP} \xrightarrow{kP4} \text{G}_{\alpha GTP} \cdot \text{PDE}^* \cdot \text{G}_{\alpha GTP}$ | $v_f = kP4 \times \text{G}_{\alpha GTP} \cdot \text{PDE}^* \cdot \text{G}_{\alpha GTP}$                                       | Activation of the second G <sub>αGTP</sub> -bound PDE subunit                                                                                                                       |
| $\text{RGS} + \text{PDE}^* \cdot \text{G}_{\alpha GTP} \xrightarrow{kRGS1} \text{RGS} \cdot \text{PDE}^* \cdot \text{G}_{\alpha GTP}$                         | $v_f = kRGS1 \times \text{RGS} \times \text{PDE}^* \cdot \text{G}_{\alpha GTP}$                                               | Binding of RGS9-1 complex to a singly-active PDE tetramer                                                                                                                           |

Table S1 – Continued from previous page

| Reaction Equation                                                                                                                 | Reaction kinetics                                                                                                                                             | Comments                                                                                        |
|-----------------------------------------------------------------------------------------------------------------------------------|---------------------------------------------------------------------------------------------------------------------------------------------------------------|-------------------------------------------------------------------------------------------------|
| $RGS \cdot G_{\alpha GTP} \cdot PDE^* \cdot G_{\alpha GTP} \xrightarrow{kRGS2} PDE^* \cdot G_{\alpha GTP} + RGS + G_{\alpha GDP}$ | $v_f = kRGS2 \times RGS \cdot G_{\alpha GTP} \cdot PDE^* \cdot G_{\alpha GTP}$                                                                                | RGS9-1-mediated deactivation of one of two PDE active subunits                                  |
| $RGS + PDE^* \cdot G_{\alpha GTP} \xrightarrow{kRGS1} RGS \cdot PDE^* \cdot G_{\alpha GTP}$                                       | $v_f = kRGS1 \times RGS \times PDE^* \cdot G_{\alpha GTP}$                                                                                                    | Binding of RGS9-1 complex to a singly active PDE                                                |
| $RGS \cdot PDE^* \cdot G_{\alpha GTP} \xrightarrow{kRGS2} PDE + RGS + G_{\alpha GDP}$                                             | $v_f = kRGS2 \times RGS \cdot PDE^* \cdot G_{\alpha GTP}$                                                                                                     | RGS9-1-mediated deactivation of the singly active PDE                                           |
| $PDE^* \cdot G_{\alpha GTP} \xrightarrow{kPDEshutoff} PDE + G_{\alpha GDP}$                                                       | $v_f = kPDEshutoff \times PDE^* \cdot G_{\alpha GTP}$                                                                                                         | Inactivation of the $PDE^* \cdot G_{\alpha GTP}$ complex by $G_{\alpha GTP}$ 's GTPase activity |
| $G_{\alpha GTP} \cdot PDE^* \cdot G_{\alpha GTP} \xrightarrow{kPDEshutoff} PDE^* \cdot G_{\alpha GTP} + G_{\alpha GDP}$           | $v_f = kPDEshutoff \times G_{\alpha GTP} \cdot PDE^* \cdot G_{\alpha GTP}$                                                                                    | Inactivation of one of the two active PDE subunits by $G_{\alpha GTP}$ 's GTPase activity       |
| $G_{\alpha GTP} \xrightarrow{kGshutoff} G_{\alpha GDP}$                                                                           | $v_f = kGshutoff \times G_{\alpha GTP}$                                                                                                                       | $G_{\alpha GTP}$ auto-catalytic GTPase activity                                                 |
| $G_{\alpha GDP} + G_{\beta\gamma} \xrightarrow{kGrecyc} G_t$                                                                      | $v_f = kGrecyc \times G_{\alpha GDP} \times G_{\beta\gamma}$                                                                                                  | Reconstitution of $G_t$ heterotrimer from inactive subunits                                     |
| $Rec_T + Ca_{free}^{2+} \xrightleftharpoons[kRec2]{kRec1} Rec_R \cdot Ca^{2+}$                                                    | $v_f = kRec1 \times Rec_T \times Ca_{free}^{2+}$<br>$v_r = kRec2 \times Rec_R \cdot Ca^{2+}$                                                                  | $Ca^{2+}$ -induced Rec conformation change                                                      |
| $Rec_R \cdot Ca^{2+} + RK \xrightleftharpoons[kRec4]{kRec3} Rec_R \cdot Ca^{2+} \cdot RK$                                         | $v_f = kRec3 \times Rec_R \cdot Ca^{2+} \times RK$<br>$v_r = kRec4 \times Rec_R \cdot Ca^{2+} \cdot RK$                                                       | Binding of RK to Rec                                                                            |
| $Ca_{free}^{2+} \xrightleftharpoons[k2]{k1} Ca_{buff}^{2+}$                                                                       | $v_f = k1 \times (eT - Ca_{buff}^{2+}) \times Ca_{free}^{2+}$<br>$v_r = k2 \times Ca_{buff}^{2+}$                                                             | $Ca^{2+}$ association and dissociation from intracellular buffers with total concentration $eT$ |
| $Ca_{free}^{2+} \xrightarrow{\gamma Ca}$                                                                                          | $v_f = \gamma Ca \times (Ca_{free}^{2+} - Ca_0^{2+})$                                                                                                         | Intracellular $Ca^{2+}$ -efflux via the $Na^+/Ca^{2+} K^+$ exchanger                            |
| $\longrightarrow Ca_{free}^{2+}$                                                                                                  | $v_f = \frac{10^6 fCa \times J_{dark}}{(2+fCa) \times F \times V_{cyto}} \times \left( \frac{cGMP}{cGMP_{dark}} \right)^{neg}$                                | Extracellular $Ca^{2+}$ -influx via the cGMP-gated cation channels                              |
| $\longrightarrow cGMP$                                                                                                            | $v_f = \frac{\alpha_{max}}{1 + \left( \frac{Ca_{free}^{2+}}{Kc_1} \right)^{m_1}} + \frac{\alpha_{max}}{1 + \left( \frac{Ca_{free}^{2+}}{Kc_2} \right)^{m_2}}$ | cGMP synthesis by guanylate cyclase                                                             |

Table S1 – *Continued from previous page*

| <b>Reaction Equation</b> | <b>Reaction kinetics</b>                                  | <b>Comments</b>        |
|--------------------------|-----------------------------------------------------------|------------------------|
| cGMP $\longrightarrow$   | $v_f = (\beta_{dark} + \beta_{sub} \times E) \times cGMP$ | cGMP hydrolysis by PDE |

---

**Table S2** Signal amplification-related model parameter values and sources

| <b>Parameter</b> | <b>Description</b>                                                                                       | <b>Value</b>                            | <b>Source</b>     |
|------------------|----------------------------------------------------------------------------------------------------------|-----------------------------------------|-------------------|
| $\omega_G$       | Exponential rate of decay of $G_t$ affinity for $R^*$ with increasing phosphorylations                   | 0.6                                     | ref. <sup>1</sup> |
| $kG1_0$          | Binding rate of $G_t$ to unphosphorylated $R^*$                                                          | $1 \times 10^{-3} \text{ s}^{-1}$       | manually tuned    |
| $kG2$            | Dissociation rate of the $R^* \cdot G_t$ complex                                                         | $2200 \text{ s}^{-1}$                   | manually tuned    |
| $kG3$            | Dissociation rate of GDP from the $R^* \cdot G_t$ complex                                                | $8500 \text{ s}^{-1}$                   | manually tuned    |
| $kG4_{GDP}$      | Association rate of GDP to the $R^* \cdot G_t$ complex                                                   | $400 \text{ s}^{-1}$                    | manually tuned    |
| $kG5_{GTP}$      | Association rate of GTP to the $R^* \cdot G_t$ complex                                                   | $3500 \text{ s}^{-1}$                   | manually tuned    |
| $kG6$            | Dissociation rate of the $R^* \cdot G_{GTP}$ complex                                                     | $8500 \text{ s}^{-1}$                   | manually tuned    |
| $kG7$            | Dissociation rate of $G_{GTP}$ into $G_{\beta\gamma}$ and $G_{\alpha GTP}$                               | $200 \text{ s}^{-1}$                    | ref. <sup>2</sup> |
| $kOps$           | Association rate of Ops (ligand-free R) and $G_t$ due to basal activity                                  | $6.1172 \times 10^{-13} \text{ s}^{-1}$ | ref. <sup>3</sup> |
| $kP1$            | Binding rate of PDE to $G_{\alpha GTP}$                                                                  | $0.05497 \text{ s}^{-1}$                | ref. <sup>2</sup> |
| $kP1_{rev}$      | Dissociation rate of $PDE \cdot G_{\alpha GTP}$ , without PDE activation                                 | $0 \text{ s}^{-1}$                      | ref. <sup>2</sup> |
| $kP2$            | Rate of activation of the first $PDE_\gamma$ subunit of $PDE \cdot G_{\alpha GTP}$                       | $940.7 \text{ s}^{-1}$                  | ref. <sup>2</sup> |
| $kP3$            | Binding rate of $G_{\alpha GTP}$ to an active $PDE \cdot G_{\alpha GTP}$ complex                         | $1.4983 \times 10^{-9} \text{ s}^{-1}$  | ref. <sup>2</sup> |
| $kP4$            | Rate of activation of the second $PDE_\gamma$ subunit of $G_{\alpha GTP} \cdot PDE \cdot G_{\alpha GTP}$ | $21.088 \text{ s}^{-1}$                 | ref. <sup>2</sup> |

**Table S3** Signal recovery-related model parameter values and sources

| Parameter     | Description                                                                                    | Value                                  | Source                                       |
|---------------|------------------------------------------------------------------------------------------------|----------------------------------------|----------------------------------------------|
| $kRK1_0$      | Binding rate of RK to unphosphorylated $R^*$                                                   | $0.1724 \text{ s}^{-1}$                | manually tuned                               |
| $\omega$      | Exponential rate of decay of RK affinity for $R^*$ with increasing phosphorylations            | 2.5                                    | manually tuned                               |
| $kRK2$        | Dissociation rate of $R^*$ from RK prior to phosphorylation                                    | $250 \text{ s}^{-1}$                   | ref. <sup>2</sup>                            |
| $kRK3_{ATP}$  | Binding rate of ATP to $R^* \cdot RK$                                                          | $4000 \text{ s}^{-1}$                  | estimated                                    |
| $kRK4$        | Dissociation rate of $R^*$ from the $R^* \cdot RK$ complex following phosphorylation           | $250 \text{ s}^{-1}$                   | manually tuned                               |
| $kArr$        | Binding rate of Arr to singly-phosphorylated $R^*$                                             | $9.9147 \times 10^{-6} \text{ s}^{-1}$ | manually tuned                               |
| $kA2$         | Dissociation rate of $R^*$ from the Arr $\cdot R^*$ complex prior to $R^*$ inactivation        | $0.026 \text{ s}^{-1}$                 | manually tuned <i>c.f.</i> ref. <sup>1</sup> |
| $m_{Arr}$     | Linear rate of increase of Arr affinity for $R^*$ with increasing phosphorylations             | $9.5475 \times 10^{-6}$                | manually tuned <i>c.f.</i> ref. <sup>1</sup> |
| $kA3$         | Dissociation rate of $R^*$ from the Arr $\cdot R^*$ complex following $R^*$ inactivation       | $1.1651 \text{ s}^{-1}$                | estimated                                    |
| $kA4$         | Binding rate of Arr to form homo-oligomers                                                     | $2.9965 \times 10^{-7} \text{ s}^{-1}$ | estimated                                    |
| $kA5$         | Dissociation rate of Arr from homo-oligomers                                                   | $0.424 \text{ s}^{-1}$                 | manually tuned <i>c.f.</i> ref. <sup>4</sup> |
| $kRrecyc$     | Rate constant for R regeneration from Ops.                                                     | $0.0007 \text{ s}^{-1}$                | ref. <sup>5</sup>                            |
| $k_{therm}$   | Thermal decay of $R^*$                                                                         | $0.0238 \text{ s}^{-1}$                | ref. <sup>6</sup>                            |
| $kGrecyc$     | Binding rate for $G_{\alpha GDP}$ to $G_{\beta\gamma}$                                         | $2 \text{ s}^{-1}$                     | ref. <sup>7</sup>                            |
| $kGshutoff$   | Rate of $G_{\alpha GTP}$ auto-catalytic GTPase activity                                        | $0.05 \text{ s}^{-1}$                  | ref. <sup>7</sup>                            |
| $kPDEshutoff$ | Rate of PDE-induced spontaneous PDE $\cdot G_{\alpha GTP}$ shutoff                             | $0.1 \text{ s}^{-1}$                   | manually tuned                               |
| $kRGS1$       | Binding rate of RGS <sub>9-1</sub> to PDE $\cdot G_{\alpha GTP}$ (one or both active subunits) | $4.8182 \times 10^{-5} \text{ s}^{-1}$ | estimated                                    |
| $kRGS2$       | Rate of hydrolysis and dissociation of one PDE subunit from $G_{\alpha GTP}$                   | $98 \text{ s}^{-1}$                    | ref. <sup>8</sup>                            |

Table S3 – Continued from previous page

| Parameter | Description                                                               | Value                          | Source            |
|-----------|---------------------------------------------------------------------------|--------------------------------|-------------------|
| $kRec1$   | Rate of $Ca^{2+}$ -triggered Rec conformational change (tense to relaxed) | $0.011 \mu M^{-1} s^{-1}$      | ref. <sup>9</sup> |
| $kRec2$   | Rate of Rec conformational change (relaxed to tense)                      | $0.05 s^{-1}$                  | ref. <sup>9</sup> |
| $kRec3$   | Binding rate of $Rec \cdot Ca^{2+}$ to RK                                 | $4.1081 \times 10^{-4} s^{-1}$ | ref. <sup>2</sup> |
| $kRec4$   | Dissociation rate of RK from $Rec-Ca^{2+}$                                | $0.610084 s^{-1}$              | ref. <sup>2</sup> |



**Table S4**  $\text{Ca}^{2+}$  and cGMP regulation-related model parameter values and sources

| Parameter        | Description                                                                                | Value                                     | Source                                                                                                                |
|------------------|--------------------------------------------------------------------------------------------|-------------------------------------------|-----------------------------------------------------------------------------------------------------------------------|
| $V_{cyto}$       | Outer segment cytoplasmic volume                                                           | 0.03916 pL                                | ref. <sup>10</sup>                                                                                                    |
| $K_{C1}$         | $EC_{50}$ for GCAP <sub>1</sub> -mediated $\text{Ca}^{2+}$ feedback on GC activity         | 171 nM                                    | estimated                                                                                                             |
| $K_{C2}$         | $EC_{50}$ for GCAP <sub>2</sub> -mediated $\text{Ca}^{2+}$ feedback on GC activity         | 59 nM                                     | ref. <sup>11</sup>                                                                                                    |
| $m_1$            | Hill coefficient for GCAP <sub>1</sub> -mediated $\text{Ca}^{2+}$ feedback on GC activity  | 3.0                                       | estimated                                                                                                             |
| $m_2$            | Hill coefficient for GCAP <sub>2</sub> -mediated $\text{Ca}^{2+}$ feedback on GC activity  | 1.5                                       | estimated                                                                                                             |
| $\alpha_{max}$   | Maximal rate of cGMP synthesis                                                             | $60 \mu\text{M s}^{-1}$                   | ref. <sup>12</sup>                                                                                                    |
| $\beta_{dark}$   | Dark rate of cGMP hydrolysis                                                               | $3.19 \text{ s}^{-1}$                     | steady-state analysis                                                                                                 |
| $\beta_{sub}$    | Rate constant for one catalytic PDE subunit                                                | $2.1826 \times 10^{-3} \text{ s}^{-1}$    | calculated <i>c.f.</i> ref. <sup>13</sup> ( $k_{cat} = 3500 \text{ s}^{-1}$ , $K_m = 17 \mu\text{M}$ , $B_{cG} = 2$ ) |
| $f_{Ca}$         | Fraction of the circulating current carried by $\text{Ca}^{2+}$                            | 0.12                                      | ref. <sup>14</sup>                                                                                                    |
| $J_{dark}$       | Dark circulating current                                                                   | 14.87 pA                                  | manually tuned                                                                                                        |
| $cGMP_{dark}$    | Dark cGMP concentration                                                                    | $6.5 \mu\text{M}$                         | manually tuned                                                                                                        |
| $n_{cg}$         | Hill coefficient for opening cGMP-gated ion channels                                       | 3.8                                       | manually tuned                                                                                                        |
| $\gamma_{Ca}$    | Rate of $\text{Ca}^{2+}$ extrusion by $\text{Na}^+/\text{Ca}^{2+}\text{K}^+$ ion exchanger | $981.3558 \text{ s}^{-1}$                 | steady-state analysis                                                                                                 |
| $Ca_{dark}^{2+}$ | Dark $\text{Ca}^{2+}$ concentration                                                        | $0.25 \mu\text{M}$                        | ref. <sup>15</sup>                                                                                                    |
| $Ca_0^{2+}$      | Minimum intracellular $\text{Ca}^{2+}$ concentration                                       | $0.023 \mu\text{M}$                       | ref. <sup>15</sup>                                                                                                    |
| $k_1$            | Binding rate of $\text{Ca}^{2+}$ to cytoplasmic buffers                                    | $9.37059 \mu\text{M}^{-1} \text{ s}^{-1}$ | estimated                                                                                                             |
| $k_2$            | Dissociation rate of $\text{Ca}^{2+}$ from cytoplasmic buffers                             | $46.412 \text{ s}^{-1}$                   | steady-state analysis                                                                                                 |
| $eT$             | Total $\text{Ca}^{2+}$ buffer molecules concentration                                      | $400 \mu\text{M}$                         | ref. <sup>2</sup>                                                                                                     |

---

## References

- 1 S. K. Gibson, J. H. Parkes and P. A. Liebman, *Biochemistry*, 2000, **39**, 5738–5749.
- 2 D. Dell’Orco, H. Schmidt, S. Mariani and F. Fanelli, *Molecular BioSystems*, 2009, **5**, 1232–1246.
- 3 T. J. Melia, C. W. Cowan, J. K. Angleson and T. G. Wensel, *Biophysical Journal*, 1997, **73**, 3182–3191.
- 4 M. Kim, S. M. Hanson, S. A. Vishnivetskiy, X. Song, W. M. Cleghorn, W. L. Hubbell and V. V. Gurevich, *Biochemistry*, 2011, **50**, 2235–2242.
- 5 M. L. Firsov, A. V. Kolesnikov, E. Y. Golobokova and V. I. Govardovskii, *Vision Research*, 2005, **45**, 147–151.
- 6 J. Xu, R. L. Dodd, C. L. Makino, M. I. Simon, D. A. Baylor and J. Chen, *Nature*, 1997, **389**, 505–509.
- 7 S. Felber, H. P. Breuer, F. Petruccione, J. Honerkamp and K. P. Hofmann, *Biophysical Journal*, 1996, **71**, 3051–3063.
- 8 N. P. Skiba, J. A. Hopp and V. Y. Arshavsky, *The Journal of Biological Chemistry*, 2000, **275**, 32716–32720.
- 9 D. Dell’Orco, M. Müller and K.-W. Koch, *Chemical Communications*, 2010, **46**, 7316–7318.
- 10 A. V. Kolesnikov, J. Fan, R. K. Crouch and V. J. Kefalov, *The Journal of Neuroscience*, 2010, **30**, 11222–11231.
- 11 I. V. Peshenko, E. V. Olshevskaya, A. B. Savchenko, S. Karan, K. Palczewski, W. Baehr and A. M. Dizhoor, *Biochemistry*, 2011, **50**, 5590–5600.
- 12 K.-W. Koch and L. Stryer, *Nature*, 1988, **334**, 64–66.
- 13 T. D. Lamb and E. N. Pugh Jr, *The Journal of Physiology*, 1992, **449**, 719–758.
- 14 O. P. Gross, E. N. Pugh and M. E. Burns, *Biophysical Journal*, 2012, **102**, 1775–1784.
- 15 M. L. Woodruff, A. P. Sampath, H. R. Matthews, N. V. Krasnoperova, J. Lem and G. L. Fain, *The Journal of Physiology*, 2002, **542**, 843–854.
